# Supplementary material for: Relationship between the Renal Function and Adverse Clinical Events in Patients with Atrial Fibrillation: A Japanese Multicenter Registry Substudy
Source: MDPI journal article supplement (doi:10.3390/jcm9010167), 2020-01-08
Supplement: s1 [file s1]

**Table S1.** Multivariable analysis of the risk factors for each adverse clinical event.

| Outcomes                              | Adjusted HR | 95% CI min | 95% CI max | p-Value |
|---------------------------------------|-------------|------------|------------|---------|
| <b>Death</b>                          |             |            |            |         |
| CrCl <50 mL/min (vs. CrCl ≥80mL/min)  | 2.40        | 1.41       | 4.07       | 0.0012* |
| Age ≥75 years                         | 2.59        | 1.78       | 3.75       | <.0001* |
| Female sex                            | 0.57        | 0.39       | 0.84       | 0.0038* |
| Body weight (<50 kg)                  | 1.29        | 0.85       | 1.96       | 0.2268  |
| Paroxysmal AF (vs. non-paroxysmal AF) | 0.83        | 0.60       | 1.15       | 0.2624  |
| Hypertension                          | 0.76        | 0.56       | 1.03       | 0.0763  |
| Diabetes                              | 1.20        | 0.87       | 1.65       | 0.2682  |
| History of heart failure              | 0.83        | 0.61       | 1.15       | 0.2682  |
| History of a stroke/TIA               | 1.01        | 0.66       | 1.54       | 0.9588  |
| History of AF ablation                | 0.68        | 0.31       | 1.49       | 0.3375  |
| DOAC use (vs. warfarin)               | 1.02        | 0.76       | 1.35       | 0.9106  |
| Antiplatelet use                      | 1.20        | 0.85       | 1.68       | 0.2999  |
| <b>Cardiovascular events</b>          |             |            |            |         |
| CrCl <50 mL/min (vs. CrCl ≥80mL/min)  | 2.53        | 1.62       | 3.94       | <.0001* |
| Age ≥75 years                         | 1.45        | 1.09       | 1.93       | 0.0117* |
| Female sex                            | 0.80        | 0.59       | 1.09       | 0.158   |
| Body weight (<50 kg)                  | 1.07        | 0.73       | 1.56       | 0.740   |
| Paroxysmal AF (vs. non-paroxysmal AF) | 1.35        | 1.03       | 1.76       | 0.0269* |
| Hypertension                          | 1.10        | 0.83       | 1.45       | 0.519   |
| Diabetes                              | 1.00        | 0.75       | 1.33       | 0.987   |
| History of heart failure              | 2.10        | 1.62       | 2.74       | <.0001* |
| History of a stroke/TIA               | 0.79        | 0.53       | 1.18       | 0.255   |
| History of AF ablation                | 0.96        | 0.58       | 1.60       | 0.883   |
| DOAC use (vs. warfarin)               | 1.14        | 0.89       | 1.46       | 0.305   |
| Antiplatelet use                      | 1.78        | 1.35       | 2.36       | <.0001* |
| <b>Stroke/SE</b>                      |             |            |            |         |
| CrCl <50 mL/min (vs. CrCl ≥80mL/min)  | 2.13        | 1.14       | 4.00       | 0.0182* |
| Age ≥75 years                         | 1.39        | 0.93       | 2.09       | 0.109   |
| Female sex                            | 0.80        | 0.51       | 1.24       | 0.310   |
| Body weight (<50 kg)                  | 1.42        | 0.84       | 2.40       | 0.187   |
| Paroxysmal AF (vs. non-paroxysmal AF) | 0.81        | 0.55       | 1.19       | 0.287   |
| Hypertension                          | 1.37        | 0.89       | 2.09       | 0.149   |
| Diabetes                              | 1.03        | 0.68       | 1.55       | 0.896   |
| History of heart failure              | 0.81        | 0.52       | 1.25       | 0.338   |
| History of a stroke/TIA               | 2.17        | 1.44       | 3.27       | 0.0002* |
| History of AF ablation                | 0.73        | 0.33       | 1.61       | 0.435   |
| DOAC use (vs. warfarin)               | 1.26        | 0.89       | 1.79       | 0.193   |
| Antiplatelet use                      | 0.98        | 0.63       | 1.54       | 0.940   |
| <b>Major bleeding</b>                 |             |            |            |         |
| CrCl <50 mL/min (vs. CrCl ≥80mL/min)  | 1.83        | 1.02       | 3.29       | 0.0434* |
| Age ≥75 years                         | 1.22        | 0.80       | 1.87       | 0.354   |
| Female sex                            | 0.77        | 0.48       | 1.23       | 0.269   |
| Body weight (<50 kg)                  | 0.92        | 0.50       | 1.70       | 0.796   |
| Paroxysmal AF (vs. non-paroxysmal AF) | 0.96        | 0.65       | 1.42       | 0.842   |
| Hypertension                          | 1.34        | 0.87       | 2.08       | 0.187   |
| Diabetes                              | 1.24        | 0.83       | 1.85       | 0.292   |
| History of heart failure              | 0.80        | 0.51       | 1.27       | 0.348   |
| History of a stroke/TIA               | 0.95        | 0.55       | 1.64       | 0.851   |
| History of AF ablation                | 0.48        | 0.19       | 1.21       | 0.122   |
| DOAC use (vs. warfarin)               | 0.96        | 0.67       | 1.38       | 0.833   |
| Antiplatelet use                      | 1.20        | 0.77       | 1.87       | 0.414   |

AF=atrial fibrillation; CI=confidence intervals; CrCl=creatinine clearance; DOAC=direct oral anticoagulant; HR=hazard risk; SE=systemic embolism. \* means p <0.05.

**Table S2.** Multivariable analysis of the risk factors for each adverse clinical event by using continuous variables for all explanatory factors.

| Outcomes                              | Adjusted HR | 95% CI min | 95% CI max | p-Value |
|---------------------------------------|-------------|------------|------------|---------|
| <b>Death</b>                          |             |            |            |         |
| Log CrCl                              | 0.49        | 0.31       | 0.76       | 0.0017* |
| Age (years)                           | 1.08        | 1.06       | 1.11       | <.0001* |
| Female sex                            | 0.51        | 0.35       | 0.74       | 0.0004* |
| Body weight (kg)                      | 0.99        | 0.97       | 1.01       | 0.313   |
| Paroxysmal AF (vs. non-paroxysmal AF) | 0.84        | 0.60       | 1.16       | 0.285   |
| Hypertension                          | 0.73        | 0.54       | 1.00       | 0.0479* |
| Diabetes                              | 1.28        | 0.92       | 1.76       | 0.139   |
| History of heart failure              | 1.60        | 1.18       | 2.18       | 0.0027* |
| History of stroke/TIA                 | 0.98        | 0.64       | 1.50       | 0.930   |
| History of AF ablation                | 0.85        | 0.39       | 1.87       | 0.686   |
| DOAC use (vs. warfarin)               | 1.05        | 0.78       | 1.40       | 0.761   |
| Antiplatelet use                      | 1.22        | 0.87       | 1.71       | 0.256   |
| <b>Cardiovascular events</b>          |             |            |            |         |
| Log CrCl                              | 0.41        | 0.29       | 0.58       | <.0001* |
| Age (years)                           | 1.04        | 1.02       | 1.06       | <.0001* |
| Female sex                            | 0.86        | 0.63       | 1.18       | 0.341   |
| Body weight (kg)                      | 1.01        | 1.00       | 1.03       | 0.057   |
| Paroxysmal AF (vs. non-paroxysmal AF) | 1.37        | 1.05       | 1.78       | 0.0199* |
| Hypertension                          | 1.01        | 0.76       | 1.34       | 0.969   |
| Diabetes                              | 0.98        | 0.73       | 1.31       | 0.880   |
| History of heart failure              | 2.04        | 1.56       | 2.66       | <.0001* |
| History of stroke/TIA                 | 0.80        | 0.54       | 1.19       | 0.271   |
| History of AF ablation                | 1.03        | 0.62       | 1.71       | 0.916   |
| DOAC use (vs. warfarin)               | 1.20        | 0.93       | 1.54       | 0.154   |
| Antiplatelet use                      | 1.75        | 1.33       | 2.32       | <.0001* |
| <b>Stroke/SE</b>                      |             |            |            |         |
| Log CrCl                              | 0.50        | 0.28       | 0.88       | 0.0171* |
| Age (years)                           | 1.03        | 1.00       | 1.05       | 0.064   |
| Female sex                            | 0.89        | 0.57       | 1.38       | 0.593   |
| Body weight (kg)                      | 1.00        | 0.98       | 1.02       | 0.729   |
| Paroxysmal AF (vs. non-paroxysmal AF) | 0.82        | 0.56       | 1.21       | 0.321   |
| Hypertension                          | 1.32        | 0.86       | 2.02       | 0.203   |
| Diabetes                              | 1.01        | 0.67       | 1.52       | 0.968   |
| History of heart failure              | 0.80        | 0.51       | 1.26       | 0.339   |
| History of stroke/TIA                 | 2.16        | 1.43       | 3.25       | 0.0002* |
| History of AF ablation                | 0.73        | 0.33       | 1.62       | 0.444   |
| DOAC use (vs. warfarin)               | 1.31        | 0.92       | 1.86       | 0.137   |
| Antiplatelet use                      | 0.96        | 0.61       | 1.51       | 0.865   |
| <b>Major bleeding</b>                 |             |            |            |         |
| Log CrCl                              | 0.43        | 0.25       | 0.75       | 0.0029* |
| Age (years)                           | 1.02        | 1.00       | 1.05       | 0.110   |
| Female sex                            | 0.90        | 0.56       | 1.45       | 0.661   |
| Body weight (kg)                      | 1.02        | 1.00       | 1.04       | 0.0180* |
| Paroxysmal AF (vs. non-paroxysmal AF) | 0.98        | 0.66       | 1.45       | 0.920   |
| Hypertension                          | 1.24        | 0.80       | 1.93       | 0.343   |
| Diabetes                              | 1.17        | 0.78       | 1.75       | 0.446   |
| History of heart failure              | 0.81        | 0.51       | 1.28       | 0.365   |
| History of stroke/TIA                 | 0.93        | 0.54       | 1.61       | 0.792   |
| History of AF ablation                | 0.51        | 0.20       | 1.28       | 0.149   |
| DOAC use (vs. warfarin)               | 0.99        | 0.69       | 1.43       | 0.976   |
| Antiplatelet use                      | 1.17        | 0.75       | 1.83       | 0.478   |

AF=atrial fibrillation; CI=confidence intervals; CrCl=creatinine clearance; DOAC=direct oral anticoagulant; HR=hazard risk; SE=systemic embolism.\* means p <0.05.
